# Supplementary material for: Distinct temporal integration of noradrenaline signaling by astrocytic second messengers during vigilance
Source: PubMed Central journal article supplement (PMC6981284; doi:10.1038/s41467-020-14378-x), 2020-01-24
Supplement: 41467_2020_14378_MOESM4_ESM.pdf [file 41467_2020_14378_MOESM4_ESM.pdf]

## **Description of Additional Supplementary Files**

File Name: Supplementary Movie 1

Description: Ca<sup>2+</sup> imaging by 5-s PS.

File Name: Supplementary Movie 2

Description: cAMP imaging by 30-s PS.

File Name: Supplementary Movie 3

Description: Extracellular NA imaging by 30-s PS.

File Name: Supplementary Movie 4

Description: Simultaneous LC/NA axons and astrocytic Ca<sup>2+</sup> in MP signal.

File Name: Supplementary Movie 5

Description: Simultaneous LC/NA axons and astrocytic Ca<sup>2+</sup> in SP signals.
